# Supplementary material for: Ethyl pyruvate inhibits glioblastoma cells migration and invasion through modulation of NF-κB and ERK-mediated EMT
Source: PeerJ journal article supplement (doi:10.7717/peerj.9559), 2020-07-21
Supplement: Data_S2-Colony_formation_assay.zip [file OD Value.xlsx]

## Sheet: Sheet1
				U251				U87
	1		1.96854	1.9344	2.06726		0.786939	0.779701	0.830454
0	2		2.5615	2.51596	2.56644		1.00816	1.00894	0.990317
	3		2.14456	2.10754	2.1513		0.759105	0.763623	0.773254
	1		0.615706	0.624454	0.611836		0.712238	0.695979	0.719681
10	2		0.662254	0.661429	0.687183		0.675855	0.68676	0.728039
	3		0.688416	0.703699	0.670107		0.713127	0.697193	0.710997
	1		0.0876863	0.0886605	0.0872156		0.13366	0.133978	0.135995
20	2		0.114406	0.112615	0.11528		0.186735	0.187622	0.18908
	3		0.1065	0.107201	0.106528		0.149001	0.148566	0.150144
	1		0.0575192	0.0531883	0.0571877		0.05466	0.0687287	0.0543221
30	2		0.0511467	0.0509497	0.0525422		0.05226	0.0516845	0.0523293
	3		0.0543883	0.0524087	0.0534202		0.0480412	0.049316	0.0471105
